# Supplementary material
Source: PubMed Central journal article supplement (PMC2714475)

Type of file: figure

Label: Supp Fig S1

Filename: JNC 5844 Supplementary materials\_figS1.eps

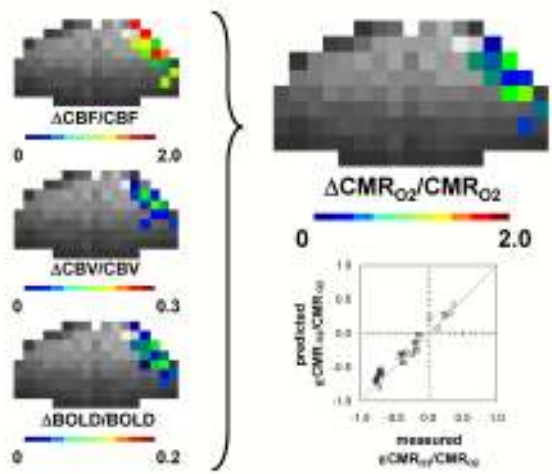

Supplement: NIHMS106247-supplement-01.pdf [file NIHMS106247-supplement-01.pdf]
